# Supplementary material for: Axon-bearing and axon-less horizontal cell subtypes are generated consecutively during chick retinal development from progenitors that are sensitive to follistatin
Source: PubMed Central journal article supplement (PMC2386784; doi:10.1186/1471-213x-8-46), 2008-04-25
Supplement: 1471-213X-8-46-S3.pdf [file 1471-213X-8-46-S3.pdf]

## Data presented in figures 2 and 6 to 9

**Fig 2: Birthdating of horizontal cells**

Expressed as % immunolabelled cells also positive for 3H-dT (analysed at st35)

| Injection stage | Prox1 | ± s.d. | Lim1 | ± s.d. | Difference (=Isl1+ HC) | t-test p<0.05 |
|-----------------|-------|--------|------|--------|------------------------|---------------|
| 19              | 34.8  | 8.1    | 29.9 | 3.9    | 4.9                    | n             |
| 20              | 48.4  | 6.7    | 40.5 | 4.3    | 7.9                    | n             |
| 21              | 58.8  | 11.5   | 44.2 | 3.3    | 14.6                   | y             |
| 22              | 57.2  | 9.5    | 33.8 | 4.7    | 23.4                   | y             |
| 23              | 52.9  | 8.5    | 21.0 | 4.3    | 31.9                   | y             |
| 24              | 50.9  | 5.5    | 15.4 | 3.8    | 35.5                   | y             |
| 25              | 41.7  | 6.6    | 9.3  | 2.8    | 32.4                   | y             |
| 26              | 43.2  | 3.8    | 8.6  | 3.0    | 34.6                   | y             |
| 27              | 27.9  | 6.4    | 5.0  | 3.8    | 22.9                   | y             |
| 28              | 26.6  | 3.3    | 6.3  | 2.8    | 20.3                   | y             |
| 29              | 14.9  | 3.9    | 6.2  | 2.0    | 8.7                    | y             |
| 30              | 11.2  | 2.2    | 4.0  | 2.1    | 7.2                    | y             |
| 31              | 7.0   | 2.3    | 2.5  | 2.6    | 4.5                    | y             |
| 32              | 2.6   | 3.0    | 0.8  | 1.0    | 1.8                    | n             |
| 33              | 1.6   | 2.0    | 0.4  | 0.8    | 1.2                    | n             |

**Fig 6A: qRT-PCR**

| Stage | Relative values |       |
|-------|-----------------|-------|
|       | Follistatin     | FSTL1 |
| st14  | 2689.24         | 3.10  |
| st16  | 593.64          | 3.36  |
| st18  | 246.28          | 3.85  |
| st21  | 63.87           | 4.78  |
| st23  | 22.77           | 4.30  |
| st25  | 5.68            | 4.99  |
| st28  | 1.00            | 4.54  |
| st30  | 1.43            | 3.36  |
| st35  | 7.45            | 1.82  |
| st38  | 157.44          | 1.14  |
| st42  | 145.83          | 1.00  |
| st45  | 110.76          | 1.30  |

**Fig. 6E: Lim1+ cells 22h after follistatin injection**

Expressed as Lim1+cells/mm<sup>2</sup>

| Stage                                       | st21    |             | st22    |             | st23    |             |
|---------------------------------------------|---------|-------------|---------|-------------|---------|-------------|
|                                             | Control | Follistatin | Control | Follistatin | Control | Follistatin |
| n animals                                   | 4       | 5           | 6       | 6           | 4       | 7           |
| Median                                      | 245.0   | 192.4       | 274.0   | 192.4       | 305.6   | 236.3       |
| p-value (MW)                                | 0.0159  |             | 0.0022  |             | 0.0424  |             |
| <b>Mean values ± s.d.</b>                   |         |             |         |             |         |             |
| Mean value                                  | 248.7   | 185.2       | 271.8   | 199.0       | 293.2   | 234.0       |
| ± pooled s.d.                               | 36.9    | 24.2        | 33.4    | 27.1        | 40.6    | 21.9        |
| <b>Expressed as % of average mean value</b> |         |             |         |             |         |             |
| Mean value                                  | 100.0   | 74.5        | 100.0   | 73.2        | 100.0   | 79.8        |
| ± s.d.                                      | 6.9     | 6.0         | 4.4     | 11.8        | 14.1    | 8.8         |

**Fig. 7C: BrdU+ cells 22h after activin injection at st23**Expressed as BrdU+cells/mm<sup>2</sup>

| Treatment                 | Control | Activin |
|---------------------------|---------|---------|
| n animals                 | 4       | 5       |
| Median                    | 1443.9  | 366.2   |
| p-value (MW)              | 0.0159  |         |
| <b>Mean values ± s.d.</b> |         |         |
| Mean value                | 1468.8  | 420.9   |
| ± pooled s.d.             | 153.9   | 78.7    |

**Fig. 8G-I: Number of horizontal cells at st35 after follistatin injection at E3**

Expressed as cells/ 40x visual field

| <b>8G: Prox1</b>                            |         |      |             |        |        |        |
|---------------------------------------------|---------|------|-------------|--------|--------|--------|
| Treatment                                   | Control |      | Follistatin |        |        |        |
| Stage                                       | st21    | st23 | st20        | st21   | st22   | st23   |
| n animals                                   | 5       | 4    | 5           | 4      | 4      | 6      |
| Median                                      | 53.5    | 58.9 | 71.1        | 70.6   | 71.4   | 75.5   |
| Mann-Whitney p-value (vs. ctrl st21)        |         |      | 0.0079      | 0.0159 | 0.0159 | 0.0043 |
| Mann-Whitney p-value (vs. ctrl st23)        |         |      | 0.0159      | 0.0286 | 0.0286 | 0.0095 |
| <b>Mean values ± s.d.</b>                   |         |      |             |        |        |        |
| Mean value                                  | 53.0    | 59.2 | 73.3        | 72.3   | 71.9   | 79.3   |
| ± pooled s.d.                               | 4.6     | 6.3  | 7.7         | 6.9    | 8.0    | 9.9    |
| <b>Expressed as % of average mean value</b> |         |      |             |        |        |        |
| Mean value                                  | 100.0   |      | 131.5       | 129.5  | 128.9  | 142.2  |
| ± s.d.                                      | 6.6     |      | 12.2        | 14.3   | 4.9    | 16.0   |

| <b>8H: Lim1</b>                             |         |      |             |        |        |        |
|---------------------------------------------|---------|------|-------------|--------|--------|--------|
| Treatment                                   | Control |      | Follistatin |        |        |        |
| Stage                                       | st21    | st23 | st20        | st21   | st22   | st23   |
| n animals                                   | 5       | 4    | 5           | 4      | 4      | 6      |
| Median                                      | 26.0    | 25.6 | 36.0        | 36.9   | 36.8   | 39.4   |
| Mann-Whitney p-value (vs. ctrl st21)        |         |      | 0.0079      | 0.0159 | 0.0159 | 0.0043 |
| Mann-Whitney p-value (vs. ctrl st23)        |         |      | 0.0159      | 0.0286 | 0.0286 | 0.0190 |
| <b>Mean values ± s.d.</b>                   |         |      |             |        |        |        |
| Mean value                                  | 26.1    | 26.7 | 35.0        | 36.6   | 36.4   | 38.3   |
| ± pooled s.d.                               | 2.6     | 2.4  | 4.0         | 3.5    | 4.4    | 5.0    |
| <b>Expressed as % of average mean value</b> |         |      |             |        |        |        |
| Mean value                                  | 100.0   |      | 133.0       | 139.1  | 138.4  | 145.4  |
| ± s.d.                                      | 6.2     |      | 8.8         | 19.5   | 5.2    | 22.0   |

| <b>8I: Isl1</b>                             |         |      |             |        |        |        |
|---------------------------------------------|---------|------|-------------|--------|--------|--------|
| Treatment                                   | Control |      | Follistatin |        |        |        |
| Stage                                       | st21    | st23 | st20        | st21   | st22   | st23   |
| n animals                                   | 5       | 4    | 5           | 4      | 4      | 6      |
| Median                                      | 25.8    | 29.6 | 40.3        | 37.3   | 43.8   | 44.4   |
| Mann-Whitney p-value (vs. ctrl st21)        |         |      | 0.0079      | 0.0159 | 0.0159 | 0.0043 |
| Mann-Whitney p-value (vs. ctrl st23)        |         |      | 0.0159      | 0.0286 | 0.0286 | 0.0095 |
| <b>Mean values ± s.d.</b>                   |         |      |             |        |        |        |
| Mean value                                  | 26.4    | 29.3 | 43.2        | 39.1   | 41.1   | 44.8   |
| ± pooled s.d.                               | 2.6     | 4.0  | 6.2         | 4.7    | 5.6    | 7.6    |
| <b>Expressed as % of average mean value</b> |         |      |             |        |        |        |
| Mean value                                  | 100.0   |      | 156.0       | 141.2  | 148.4  | 161.8  |
| ± s.d.                                      | 7.2     |      | 33.9        | 19.3   | 11.5   | 28.8   |

**Fig. 9G-I: Number of various cell types at st35 after follistatin injection at st23**  
Expressed as cells/ 40x visual field

| <b>9G: Photoreceptors</b> |          |             |          |             |
|---------------------------|----------|-------------|----------|-------------|
| Cell type                 | Isl1 PRs |             | Lim3 PRs |             |
| Treatment                 | Control  | Follistatin | Control  | Follistatin |
| n animals                 | 4        | 6           | 3        | 4           |
| Median                    | 96.6     | 99.0        | 115.3    | 108.0       |
| p-value (MW)              | 0.914    |             | 0.400    |             |
| <b>Mean values ± s.d.</b> |          |             |          |             |
| Mean value                | 97.9     | 104.2       | 111.4    | 105.2       |
| ± pooled s.d.             | 7.6      | 14.2        | 7.4      | 9.8         |

| <b>9H: Bipolar cells</b>  |          |             |          |             |
|---------------------------|----------|-------------|----------|-------------|
| Cell type                 | Isl1 BPs |             | Lim3 BPs |             |
| Treatment                 | Control  | Follistatin | Control  | Follistatin |
| n animals                 | 4        | 6           | 3        | 4           |
| Median                    | 121.4    | 128.5       | 228.8    | 231.5       |
| p-value (MW)              | 0.610    |             | 0.857    |             |
| <b>Mean values ± s.d.</b> |          |             |          |             |
| Mean value                | 121.5    | 115.0       | 234.4    | 234.1       |
| ± pooled s.d.             | 11.8     | 15.9        | 14.9     | 21.8        |

| <b>9I: Ganglion cells and amacrine cells</b> |               |             |          |             |
|----------------------------------------------|---------------|-------------|----------|-------------|
| Cell type                                    | Isl1 RGCs/ACs |             | Ap2α ACs |             |
| Treatment                                    | Control       | Follistatin | Control  | Follistatin |
| n animals                                    | 4             | 6           | 3        | 4           |
| Median                                       | 109.6         | 119.4       | 242.0    | 244.5       |
| p-value (MW)                                 | 0.257         |             | 0.629    |             |
| <b>Mean values ± s.d.</b>                    |               |             |          |             |
| Mean value                                   | 107.6         | 117.6       | 238.9    | 245.5       |
| ± pooled s.d.                                | 10.2          | 19.2        | 14.3     | 17.5        |

**Note on "pooled s.d.-values":**

The "± pooled s.d."- values were calculated by pooling the variances of all individuals adhering to a specific stage and treatment, using the standard formula:

$$PooledSD = \sqrt{\frac{((n_1 - 1)s_1^2 + (n_2 - 1)s_2^2 + \dots)}{((n_1 - 1) + (n_2 - 1) + \dots)}}$$

n= number of observations for each individual (eg. Individual 1= 4 observations, individual 2= 8 observations)  
s= s.d. for those 4 or 8 observations, respectively

Thus, each s.d. value that belongs to an individual is weighed based on the number of observations that gave the value. (e.g. A s.d.-value based on 4 observations is given less weight than a s.d.-value based on 8 observations).

P-values were calculated in Prism using either the Student's t-test (Fig. 2), or the Mann-Whitney (Figs. 6-9, indicated by MW).
